# Supplementary material
Source: Springer Nature journal article supplement (https://www.springermedizin.de/resource/supplementary/12889_2012_4922_MOESM2_ESM.pdf/9490712)
Supplement: MOESM2 [file 9490712]

5328 records identified through database searches.  
25 records from hand-searching of reference lists and internet search

5288 citations judged irrelevant by title, abstract or duplicates.

65 full reports retrieved for review.

49 reports excluded:  
Reasons  
-No relevant intervention n=10  
-No relevant outcomes n=1  
-Ineligible study design n=36  
-Study location low income country n=1  
-Study population not disadvantaged n=1

16 reports included in review

14 unique studies included in review

11 comprehensive food subsidy studies:  
-8 WIC studies  
-1 Food Stamp Program study  
-1 Family food packages study  
-1 Supermarket price discount study

3 limited food subsidy studies:  
-1 WIC plus fruit and vegetables study  
-1 Fruit and vegetable subsidy study  
-1 Fruit juice subsidy study
